# Supplementary material for: Choline Protects the Heart from Doxorubicin‐Induced Cardiotoxicity through Vagal Activation and Nrf2/HO‐1 Pathway
Source: Hindawi journal article supplement (doi:10.1155/2022/4740931), 2022-01-01
Supplement: f1 [file 4740931.f1.pdf]

1 **Supplementary materials for Choline protects heart from doxorubicin-induced**  
2 **cardiotoxicity through vagal activation and Nrf2/HO-1 pathway**

3  
4 **Authors:** Fuding Guo, MD<sup>a</sup>†, Yueyi Wang, MD, PhD<sup>a, †</sup>, Jun Wang, MD<sup>a</sup>†, Zhihao  
5 Liu, MD<sup>a</sup>, Yanqiu Lai, MD<sup>a</sup>, Zhen Zhou, MD<sup>a</sup>, Zihan Liu, MD<sup>a</sup>, Yuyang Zhou, MD<sup>a</sup>,  
6 Xiao Xu, MD<sup>a</sup>, Zeyan Li, MD<sup>a</sup>, Meng Wang, MD<sup>a</sup>, Fu Yu, MD<sup>a</sup>, Ruijie Hu, MD<sup>a</sup>,  
7 Liping Zhou, MD<sup>a</sup>, Hong Jiang, MD, PhD<sup>a, \*</sup>

8  
9 **Affiliation:**

10 <sup>a</sup>Department of Cardiology, Renmin Hospital of Wuhan University; Cardiac  
11 Autonomic Nervous System Research Centre of Wuhan University; Cardiovascular  
12 Research Institute, Wuhan University; Hubei Key Laboratory of Cardiology, Wuhan,  
13 China

14 † **These authors contributed equally to this work.**

15  
16 **\*Address for correspondence:**

17 **Hong Jiang, MD, PhD**

18 Department of Cardiology, Renmin Hospital of Wuhan University,  
19 No. 238 Jiefang Road, Wuhan City, Hubei Province 430060, P.R. China,  
20 Tel: +86 27 88041911; Fax: +86 27 88040334,  
21 E-mail: [hong-jiang@whu.edu.cn](mailto:hong-jiang@whu.edu.cn)

22  
23  
24  
25  
26  
27  
28  
29  
30

31 Supplemental Material includes:

32 Graphical Abstract

33

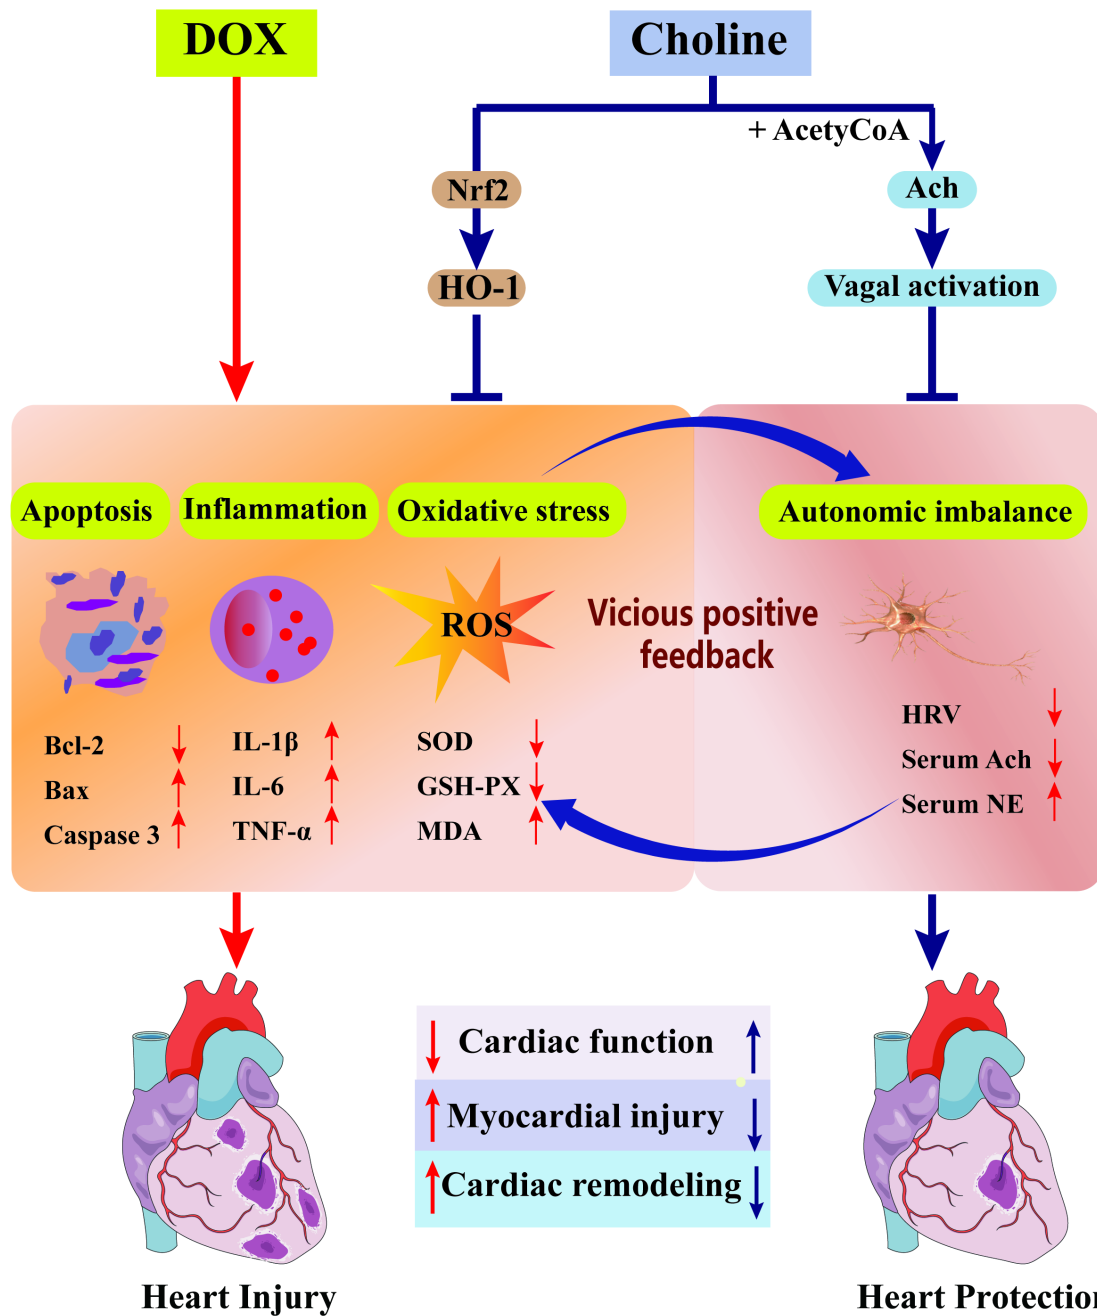

35 Central illustration of related mechanisms of choline in preventing DOX-induced  
36 cardiotoxicity. The protective effect of choline may be associated with the enhancement  
37 of vagal activity and the activation of the Nrf2/HO-1 signaling pathway in DOX-treated  
38 rats. A simple and non-invasive pharmacological treatment with oral choline may  
39 represent a valuable adjunct therapeutic approach for the alleviation of DOX-induced  
40 cardiotoxicity in clinic.
